# Supplementary material for: Anticancer mechanism of 7-α-hydroxyfrullanolide on microtubules and computational prediction of its target binding in triple-negative breast cancer cells
Source: PeerJ journal article supplement (doi:10.7717/peerj.13508), 2022-05-27
Supplement: Supplementary_file.pdf [file Supplementary_file.pdf]

## **Anticancer Mechanism of 7- $\alpha$ -Hydroxyfrullanolide on Microtubules and Computational Prediction of its Target Binding in Triple-Negative Breast Cancer Cells**

Siriphorn Chimplee<sup>1</sup>, Carl Smythe<sup>2</sup>, Varomyalin Tipmanee<sup>1</sup>, Suchada Sukrong<sup>3</sup>, Kanyanatt Kanokwiroon<sup>1,\*</sup>

<sup>1</sup> Department of Biomedical Sciences and Biomedical Engineering, Faculty of Medicine, Prince of Songkla University, Hat Yai, Songkhla, Thailand

<sup>2</sup> School of Biosciences, University of Sheffield, Sheffield, United Kingdom

<sup>3</sup> Center of Excellence in DNA Barcoding of Thai Medicinal Plants, Department of Pharmacognosy and Pharmaceutical Botany, Faculty of Pharmaceutical Sciences, Chulalongkorn University, Bangkok, Thailand

Corresponding Author:

Kanyanatt Kanokwiroon<sup>1</sup>

15 Kanjanavanich, Khohong, Hat Yai, Songkhla, 90110, Thailand

Email address: kanyanatt.k@psu.ac.th

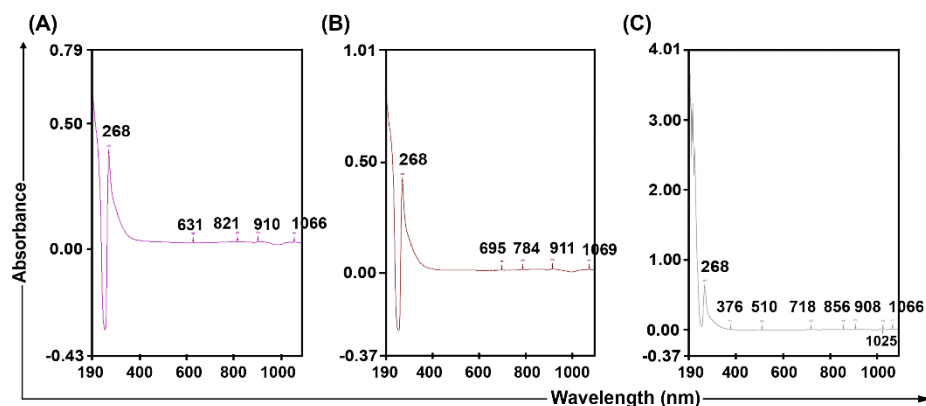

**Figure S1:** Maximum absorbance ( $\lambda_{\max}$ ) identification at 1,006.77  $\mu\text{M}$  7HF  
(A-C) The peaks were identified in 1,006.77  $\mu\text{M}$  of sample n1, n2, and n3, respectively

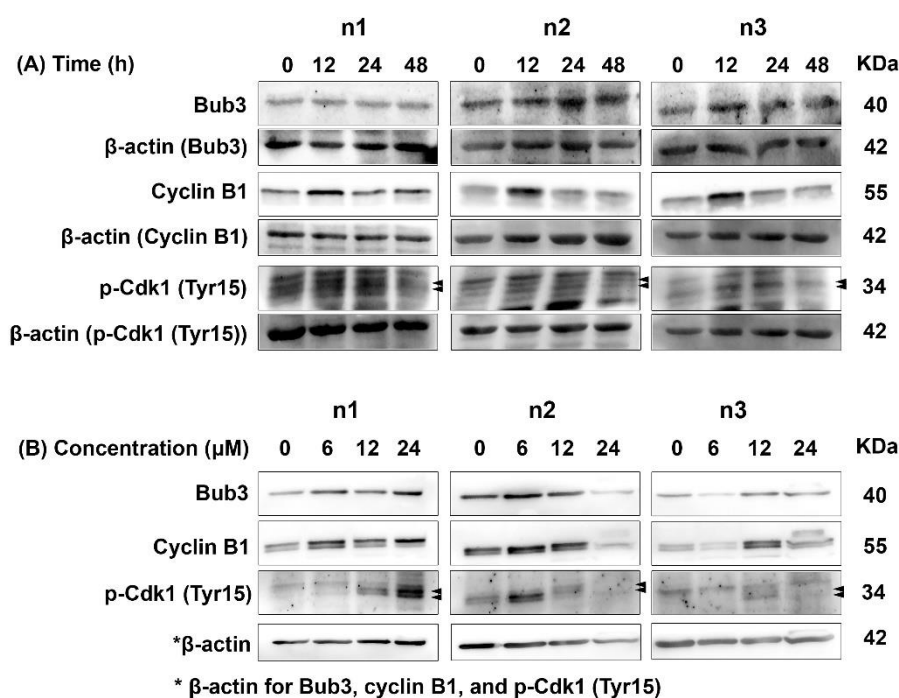

**Figure S2:** Protein expressions were evaluated using western blotting. (A) Bub3, cyclin B1, and p-Cdk1 (Tyr15) were detected at 6  $\mu\text{M}$  7HF for 0, 12, 24, and 48 h. (B) Bub3, cyclin B1, and p-Cdk1 (Tyr15) were performed at 0, 6, 12, and 24  $\mu\text{M}$  7HF for 24 h. These proteins were depicted along with their  $\beta$ -actin. The results were performed in two-three independent experiments (n1-n2/n1-n3). The experiment n1-n3 used for calculation of band intensity (or relative expression) from indicated protein and  $\beta$ -actin as representing in histogram Figure 2D-E. The full original western blot images in Figure 2D and Figure 2E were showed in page 3-5 and page 6-8 as follows: Bub3, Cyclin B1, and p-Cdk1 (Tyr15). In full original blot, 0, 6, 12, and 24  $\mu\text{M}$ ; 7HF treatment does (0, 6, 12, and 24  $\mu\text{M}$ ), 0, 12, 24, and 48 h; 7HF treatment times (0, 12, 24, and 48 h), Black outer square; border of full images, Red inner square and black head arrow; indicated protein bands, #; The blots are shown the same in Figure 2D-E.

**Bub3 (40 KDa) and  $\beta$ -actin (42 KDa)**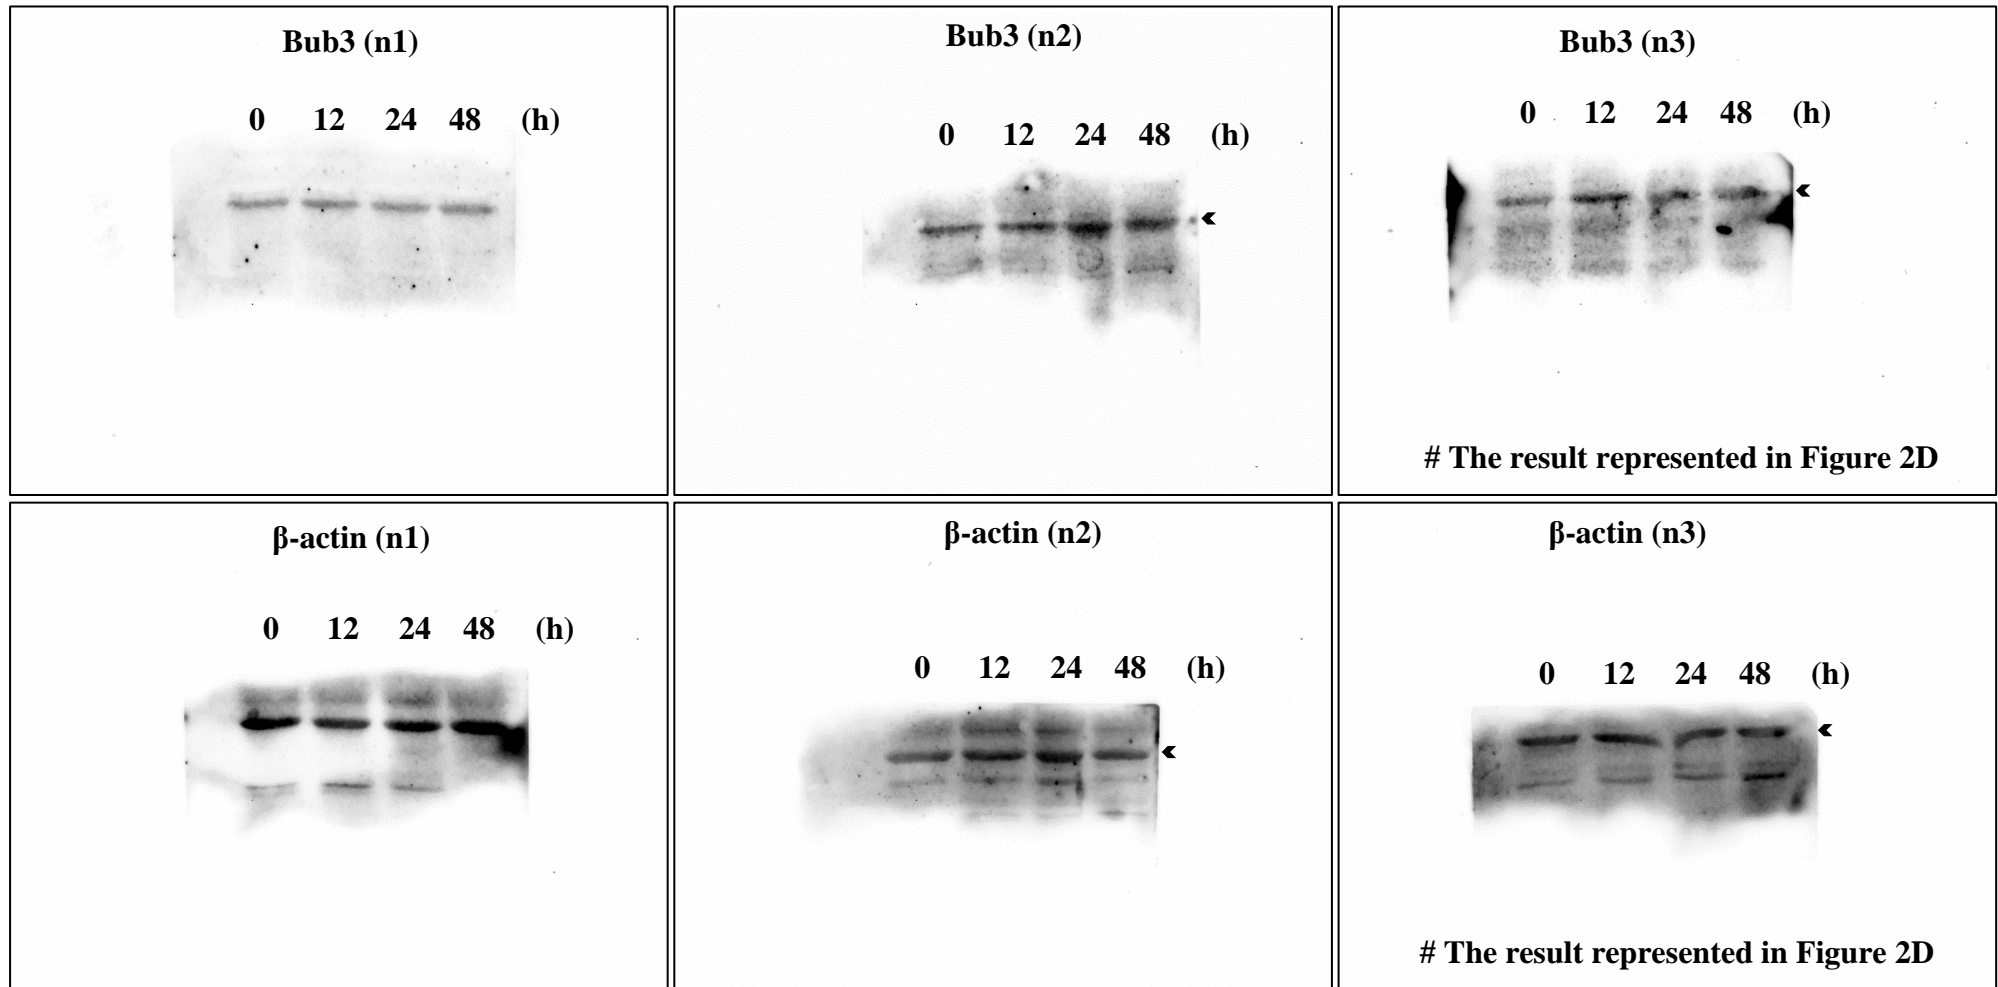

**Cyclin B1 (55 KDa) and  $\beta$ -actin (42 KDa)**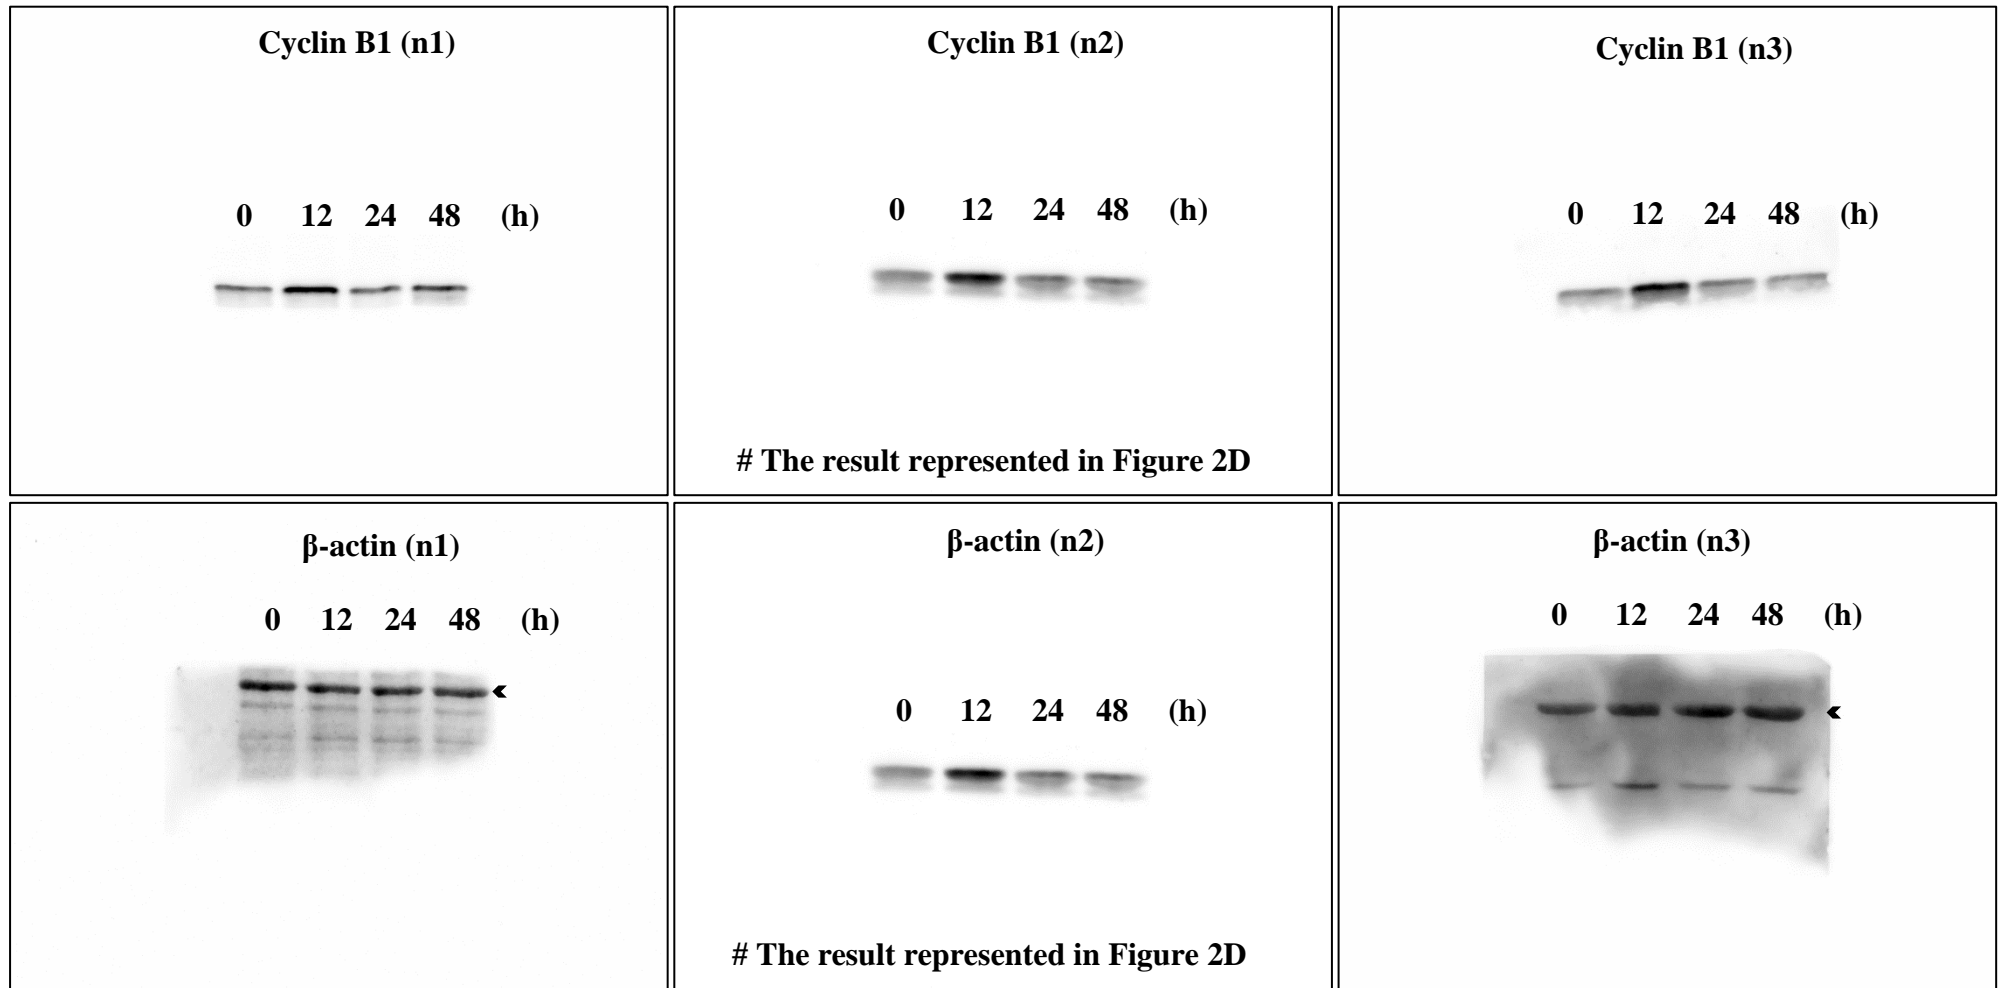

p-Cdk1 (Tyr15) (34 KDa) and  $\beta$ -actin (42 KDa)

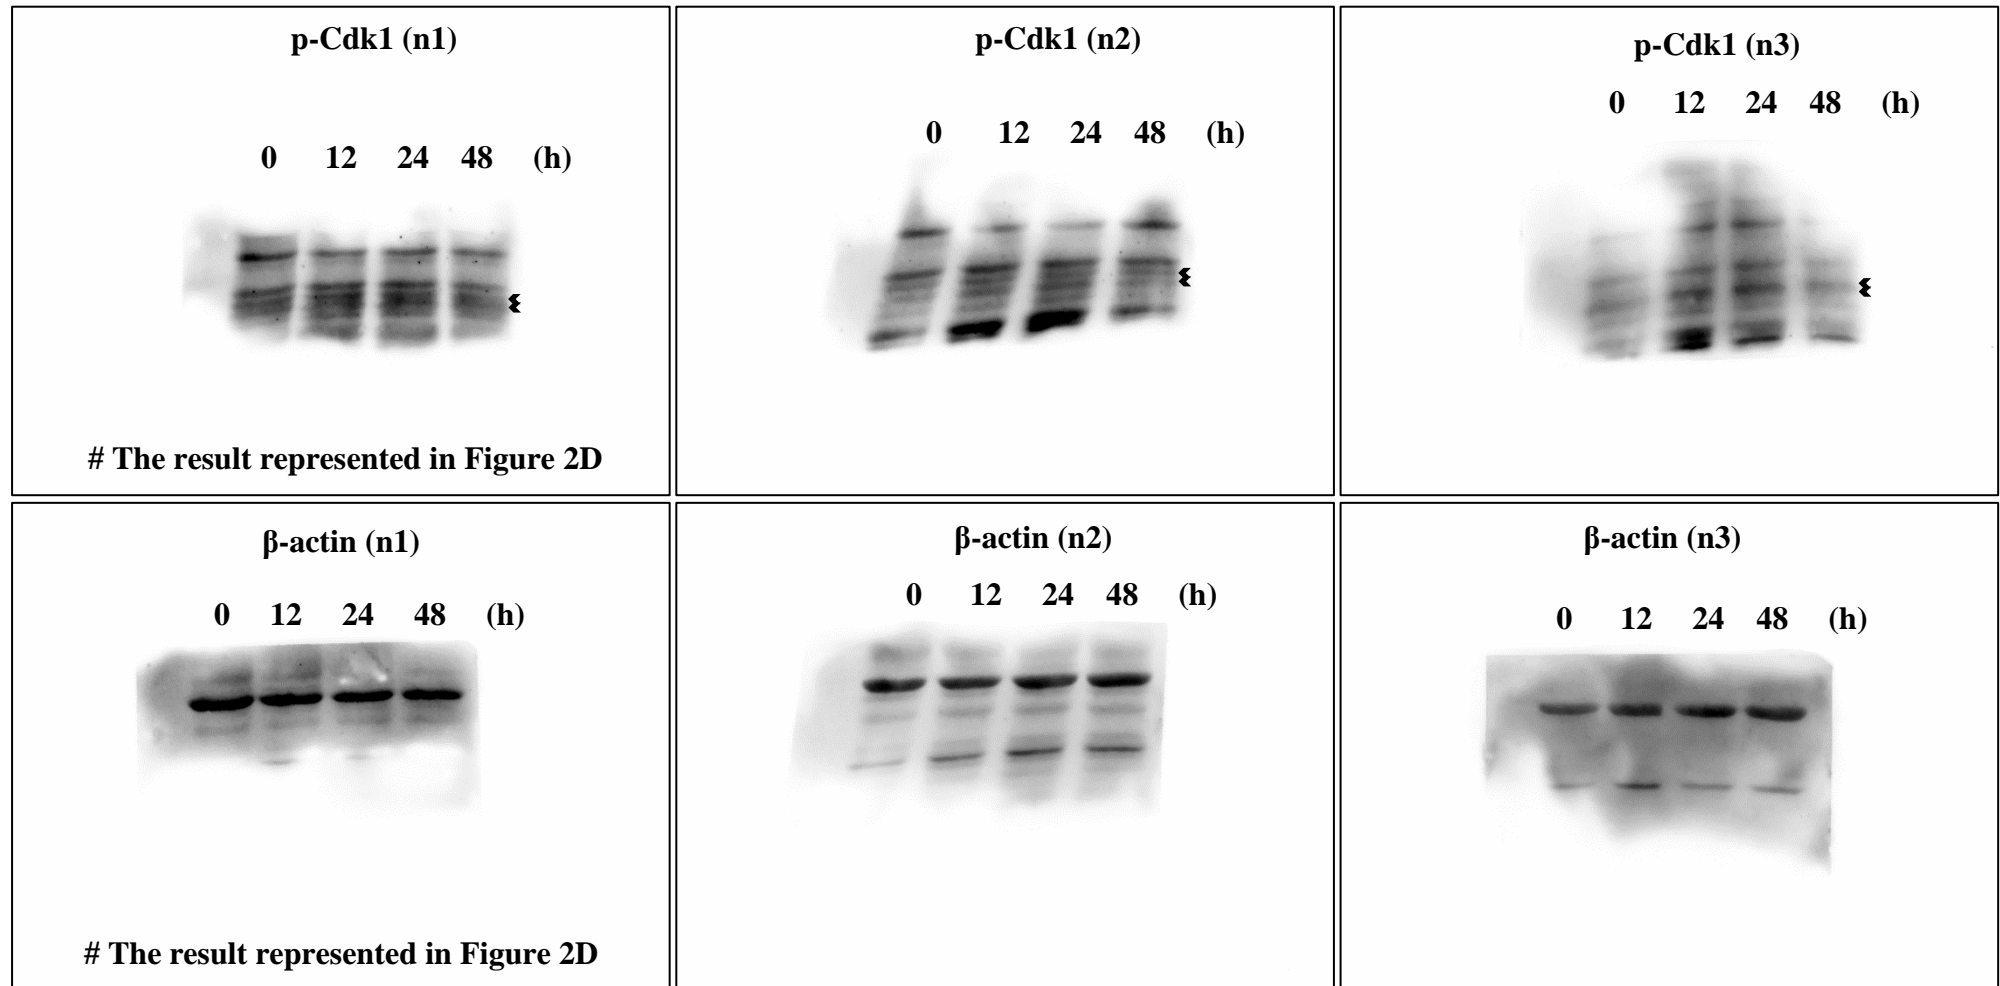

**Bub3 (40 KDa) and  $\beta$ -actin (42 KDa)**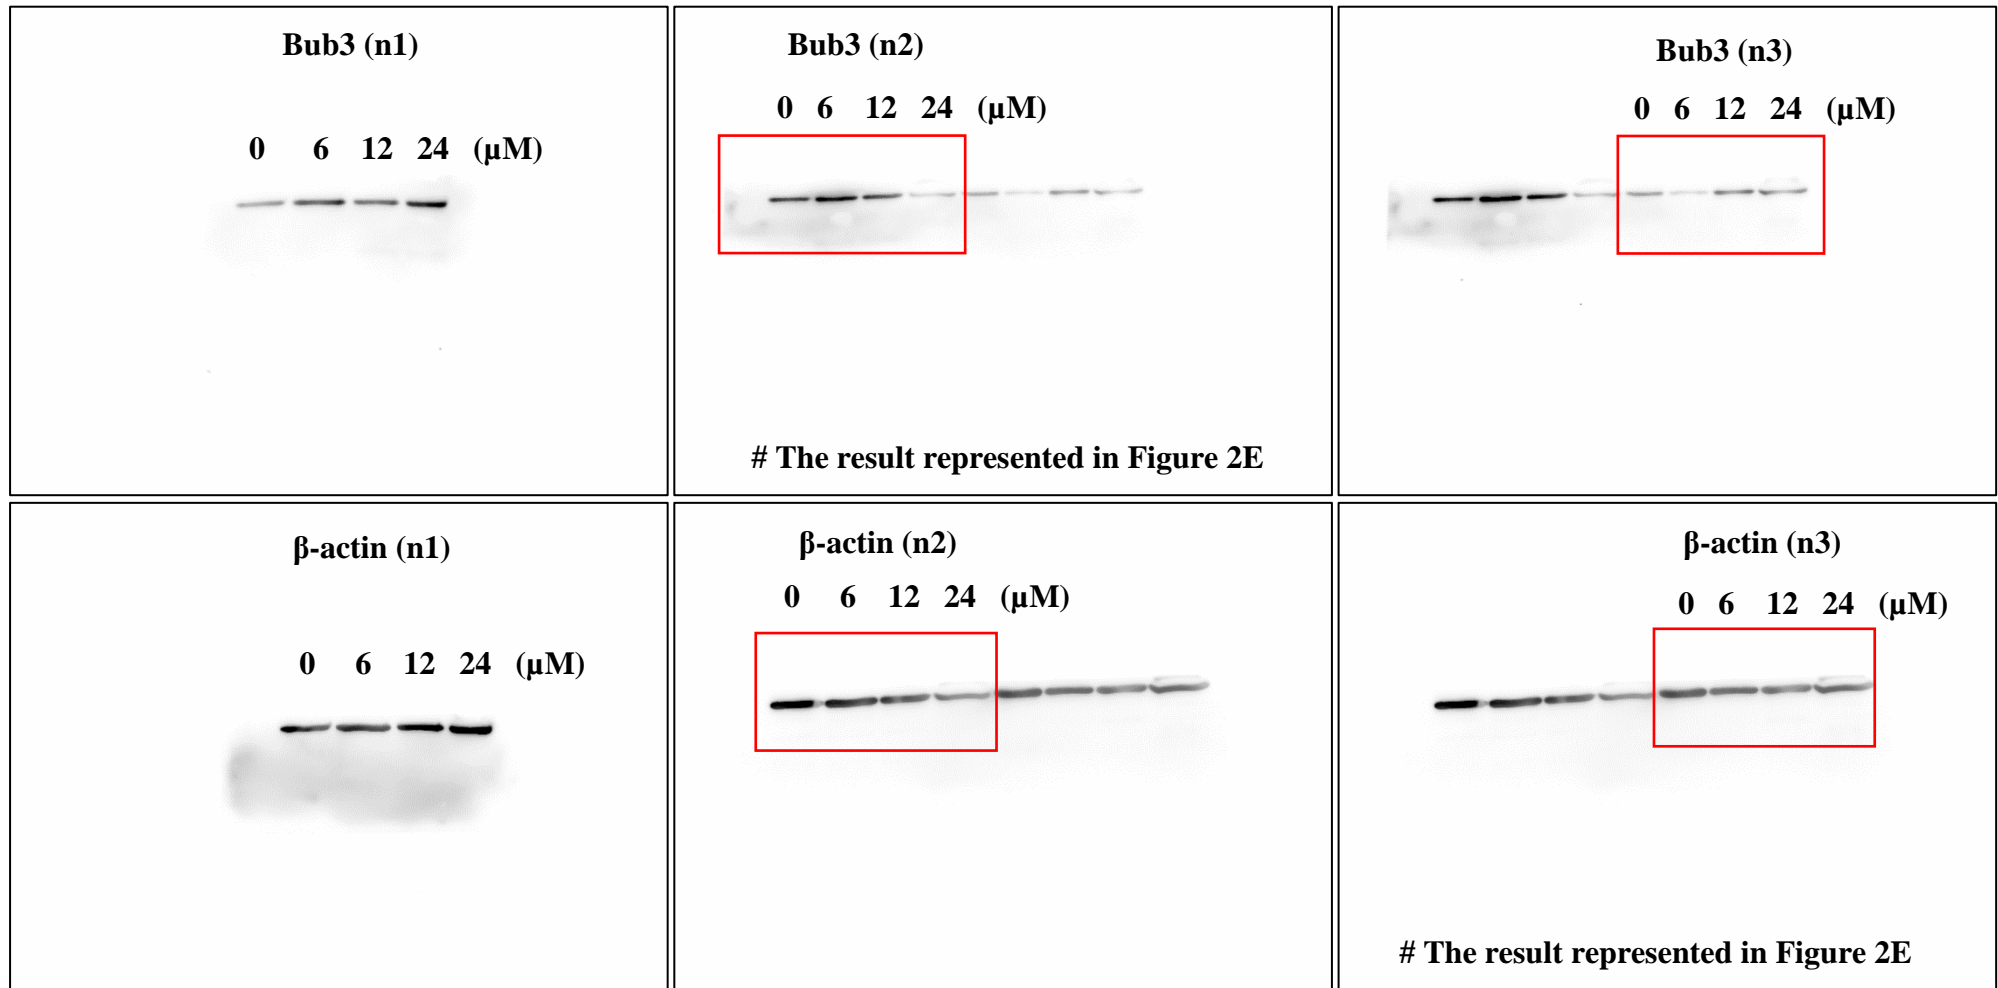

**Note:** Bub3 at 6  $\mu$ M was used intensity calculation for n1-n2

**Cyclin B1 (55 KDa) and  $\beta$ -actin (42 KDa)**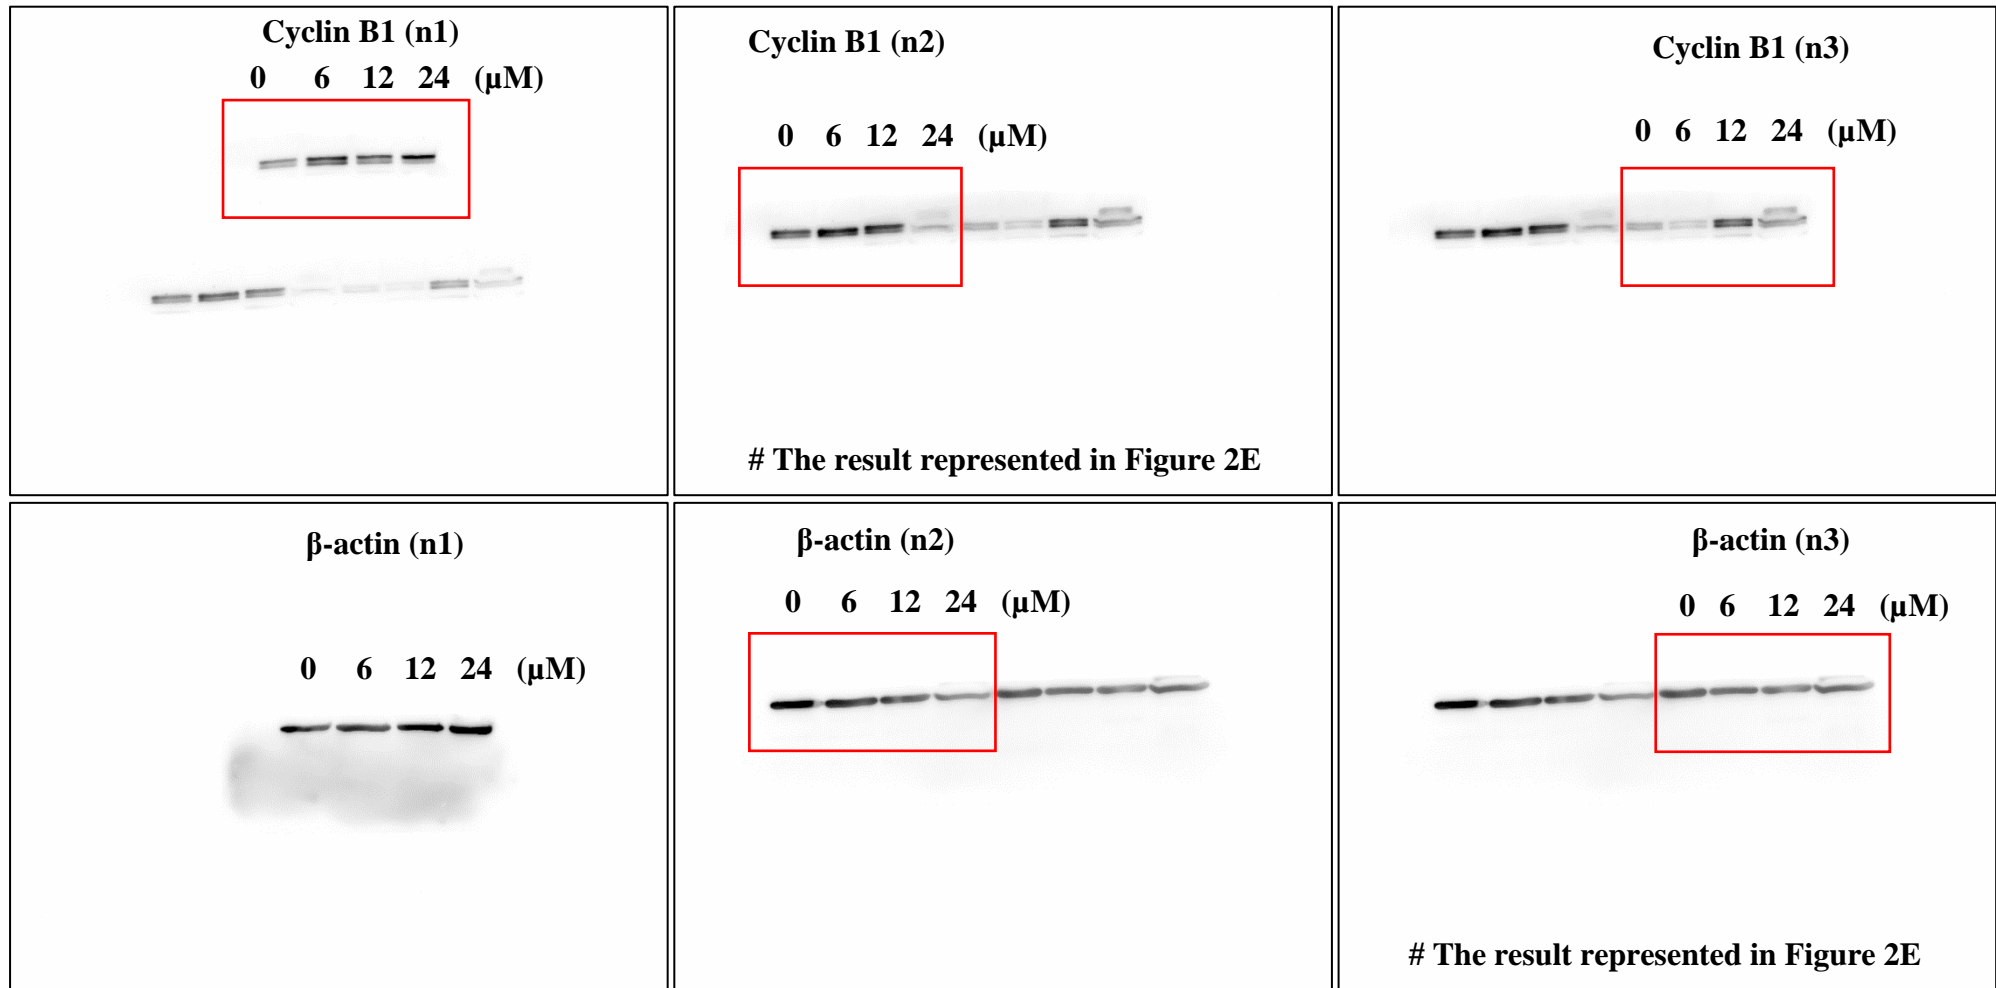

**Note:** Cyclin B1 at 6  $\mu$ M was used intensity calculation for n1-n2

p-Cdk1 (Tyr15) (34 KDa) and  $\beta$ -actin (42 KDa)

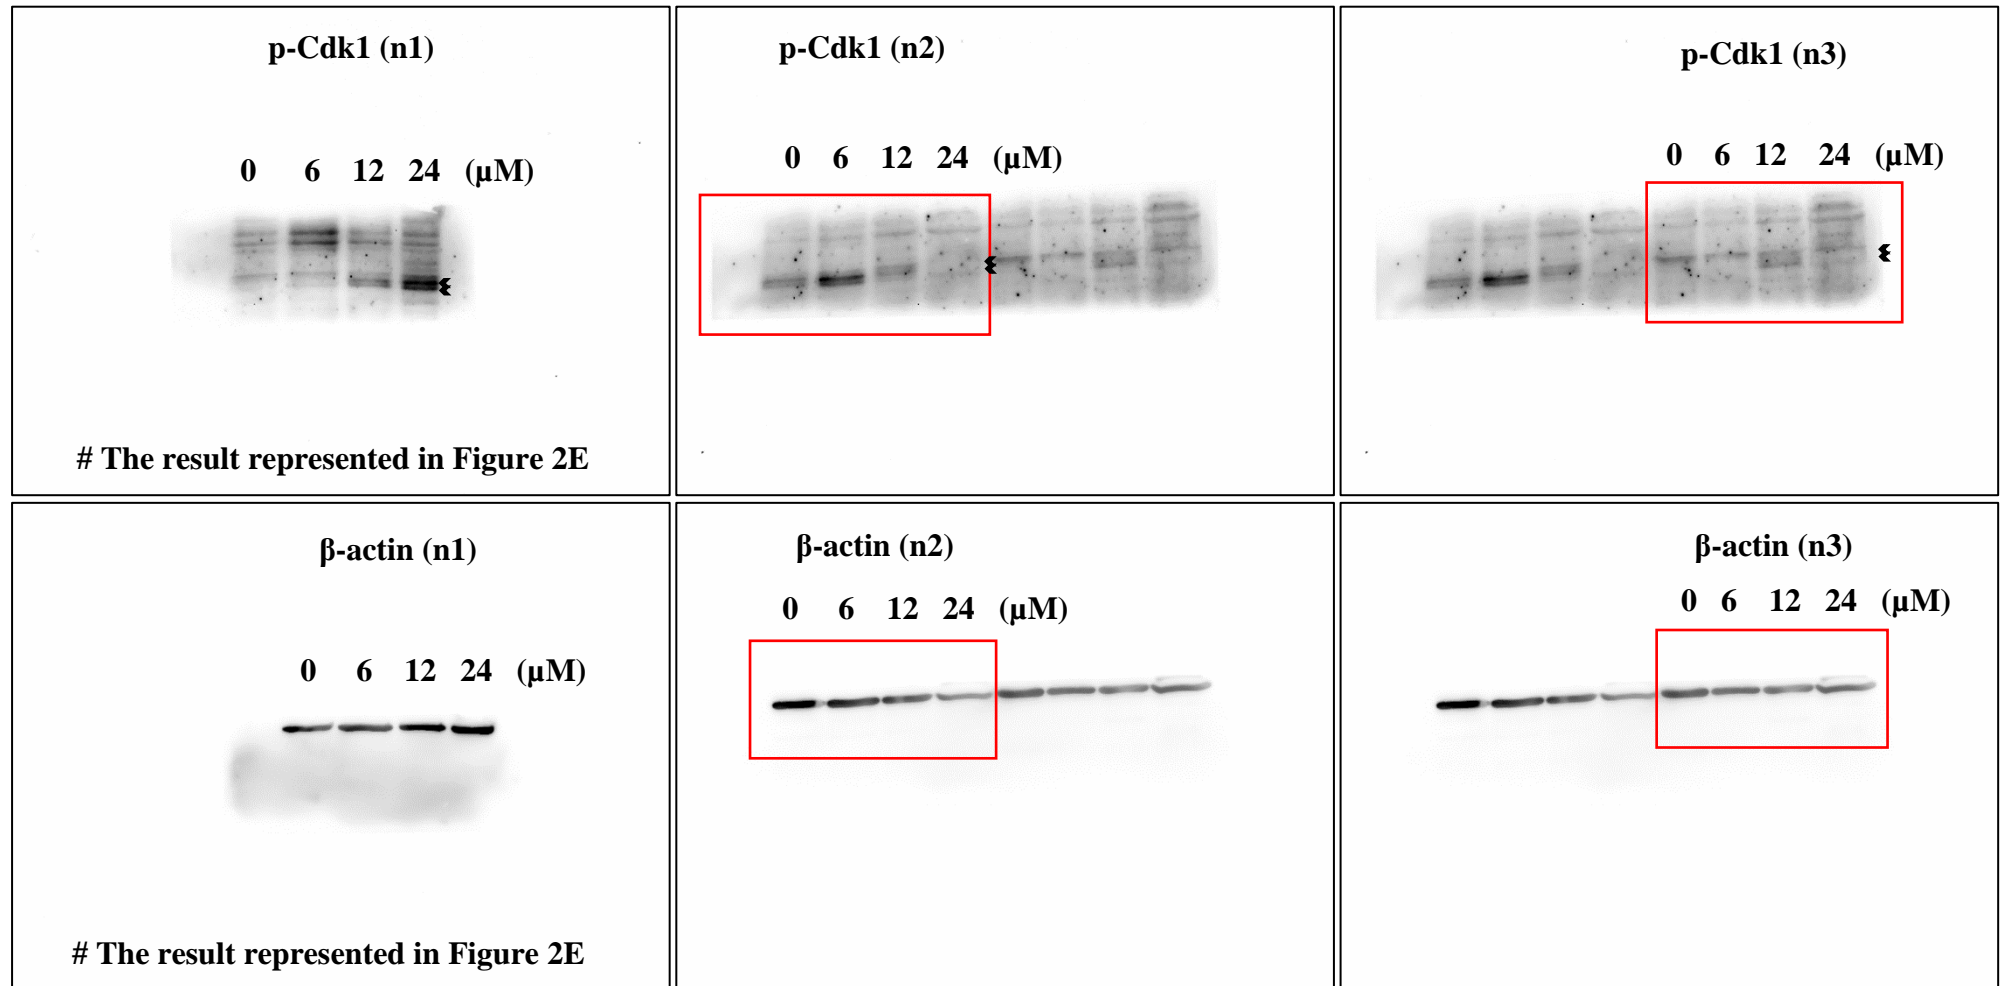



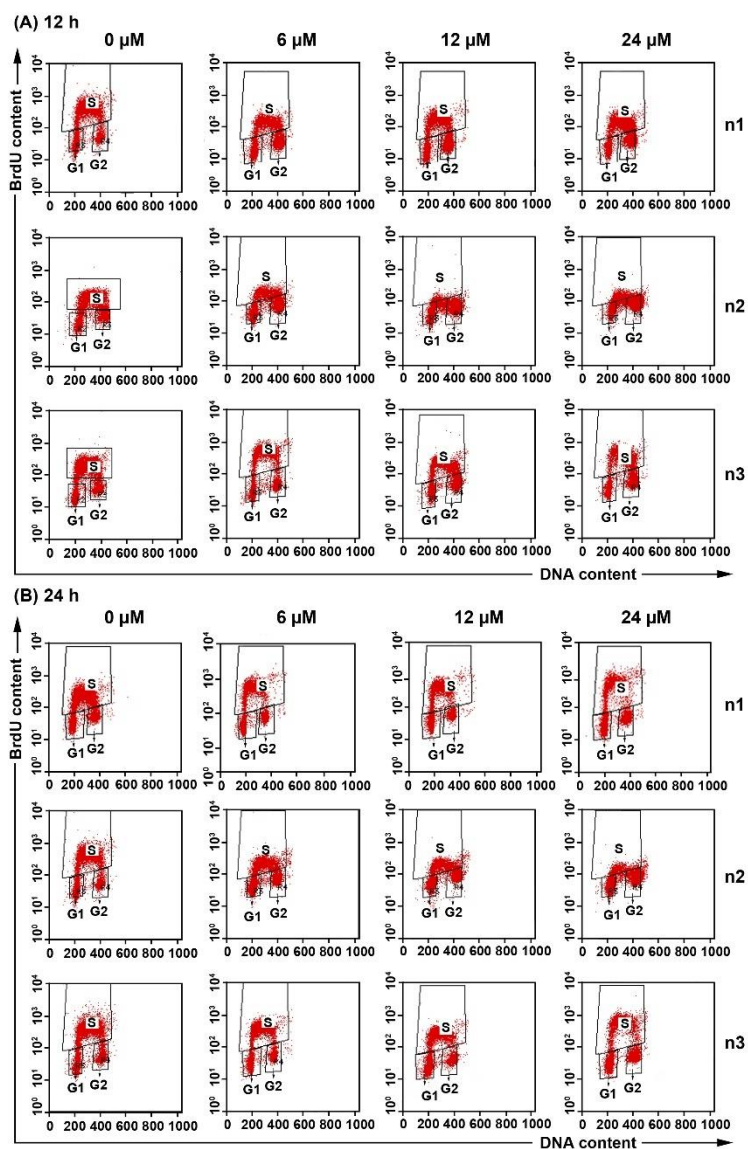

**Figure S3:** Cell population was evaluated bromodeoxyuridine plus propidium iodide staining using fluorescence assisted cell sorting analysis in 7HF-treated cells at 0, 6, 12, and 24  $\mu$ M for 12 h **(A)** and 24 h **(B)**. Left-lower, middle-top, and right-lower quadrants represent the number of cells in G1, S, and G2 phases, respectively. BrdU; bromodeoxyuridine, n1-n3; the sample 1, 2, and 3.

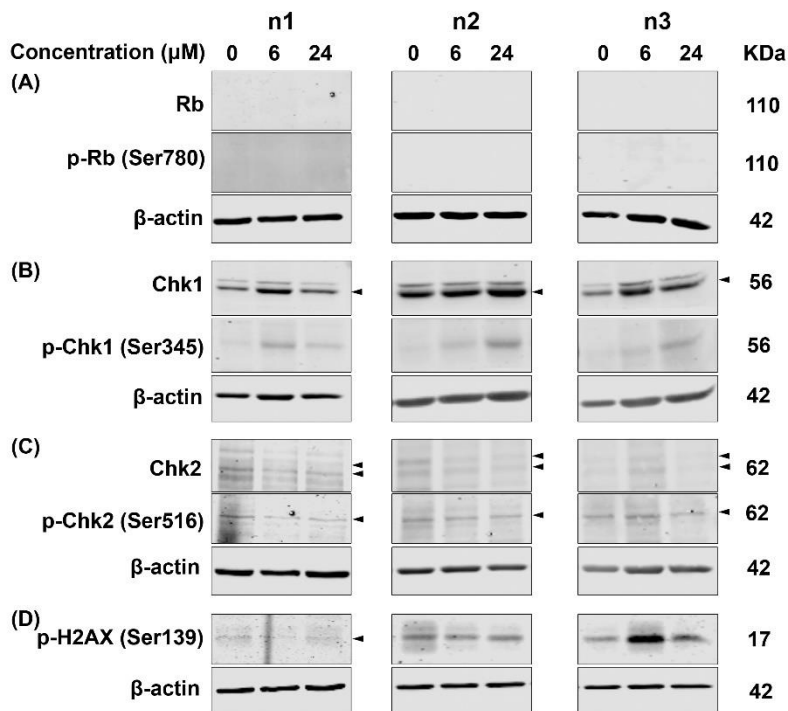

**Figure S4:** Protein expressions were evaluated using western blotting. (A) Rb and p-Rb Ser780, (B) Chk1 and p-Chk1 Ser345, (C) Chk2 and p-Chk2 Ser516, and (D) p-H2AX Ser139 were examined at 6 and 24 μM 7HF for 24 h. These proteins were depicted along with their β-actin. The results were performed in two-three independent experiments (n1-n2/n1-n3). The experiment n1-n3 used for calculation of band intensity (or relative expression) from indicated protein and β-actin as representing in histogram Figure 3D. The full original western blot images in Figure 3D were showed in page 11-17 as follows: Rb, p-Rb Ser780, Chk1, p-Chk1 Ser345, Chk2, p-Chk2 Ser516, and p-H2AX Ser139. In full original blot, 0, 6, and 24 μM; 7HF treatment does (0, 6 and 24 μM), Black outer square; border of full images, Red inner square and black head arrow; indicated protein bands, # and arrow; The blots are shown the same in Figure 3D. Note. Original full fluorescence western blot images were also depicted in page 18-21 as follows: Rb/p-Rb, Chk1/p-Chk1, Chk2/p-Chk2, and p-H2AX. β-actin was along with the proteins. M; Protein marker, White square and head arrow; indicated protein bands.

**Rb (110 KDa) and p-Rb Ser780 (110 KDa)**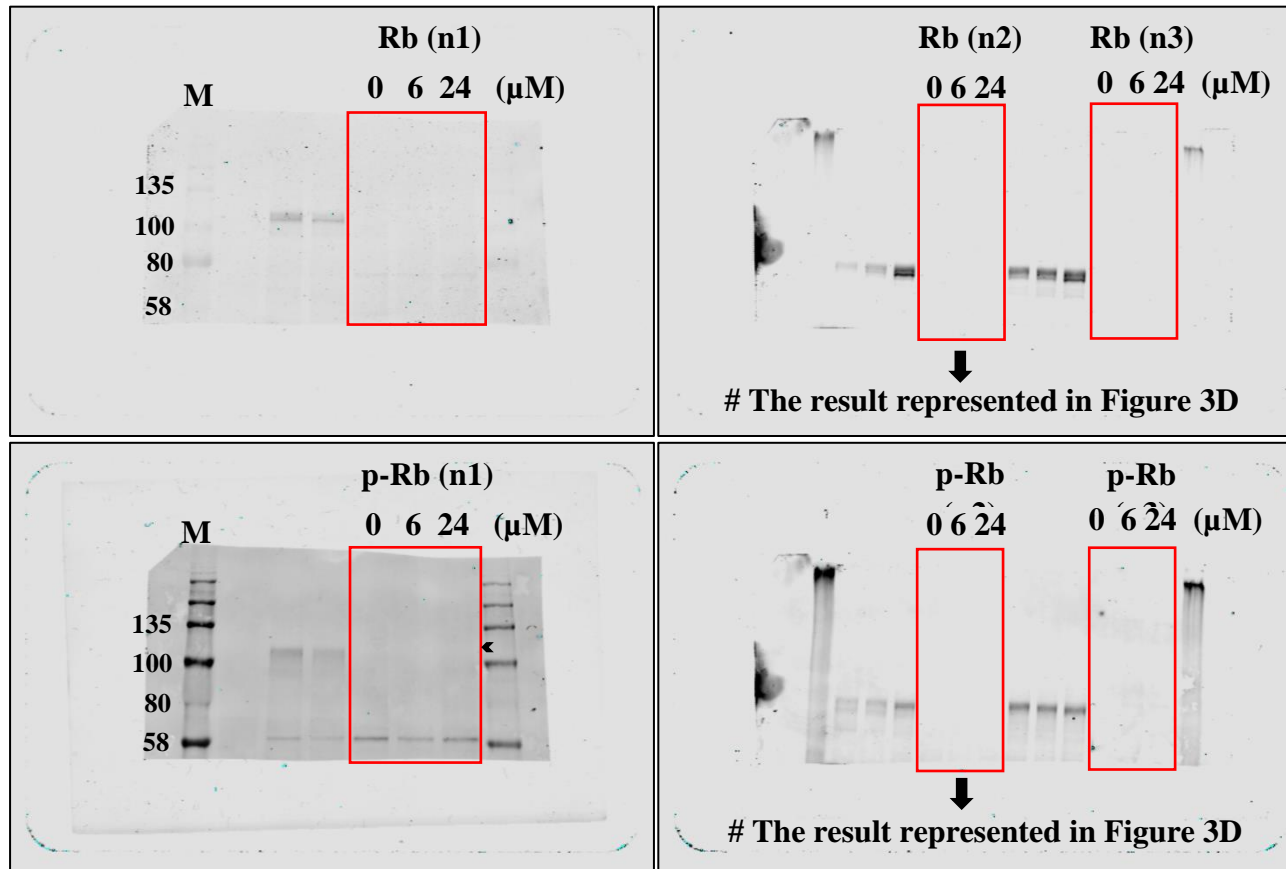

**$\beta$ -actin (42 KDa) of Rb and p-Rb**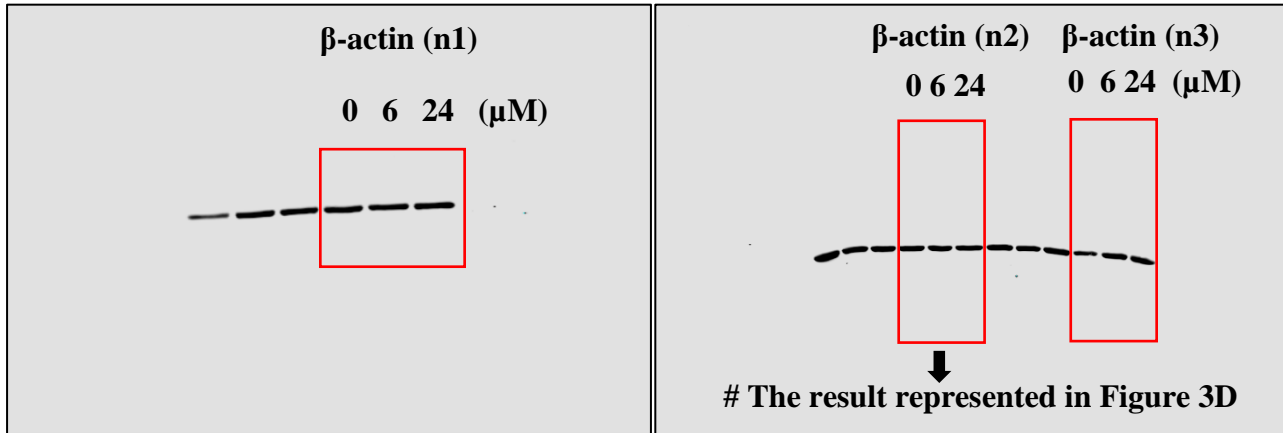

**Chk1 (56 KDa) and p-Chk1 Ser345 (56 KDa)**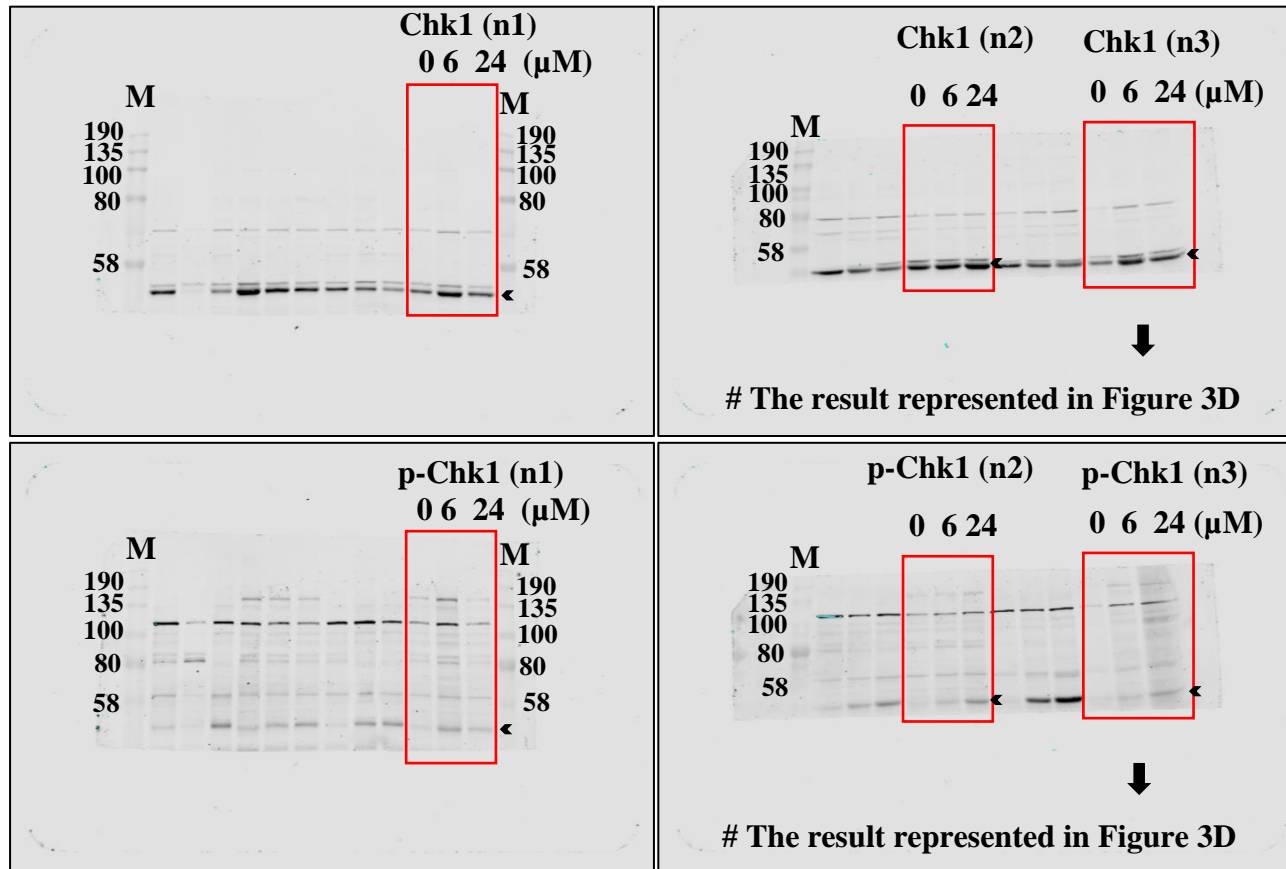

**$\beta$ -actin (42 KDa) of Chk1 and p-Chk1**

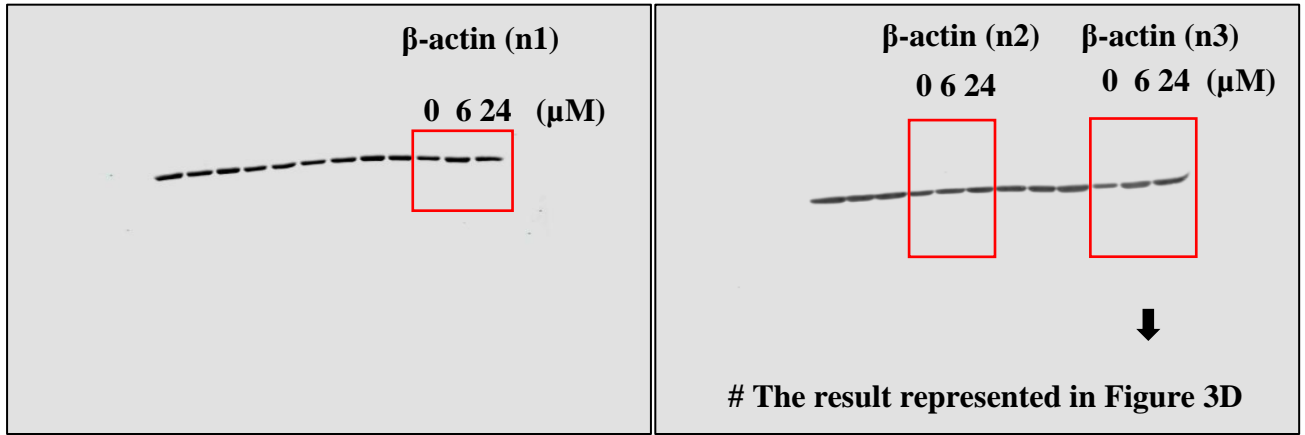

**Chk2 (62 KDa) and p-Chk2 Ser516 (62 KDa)**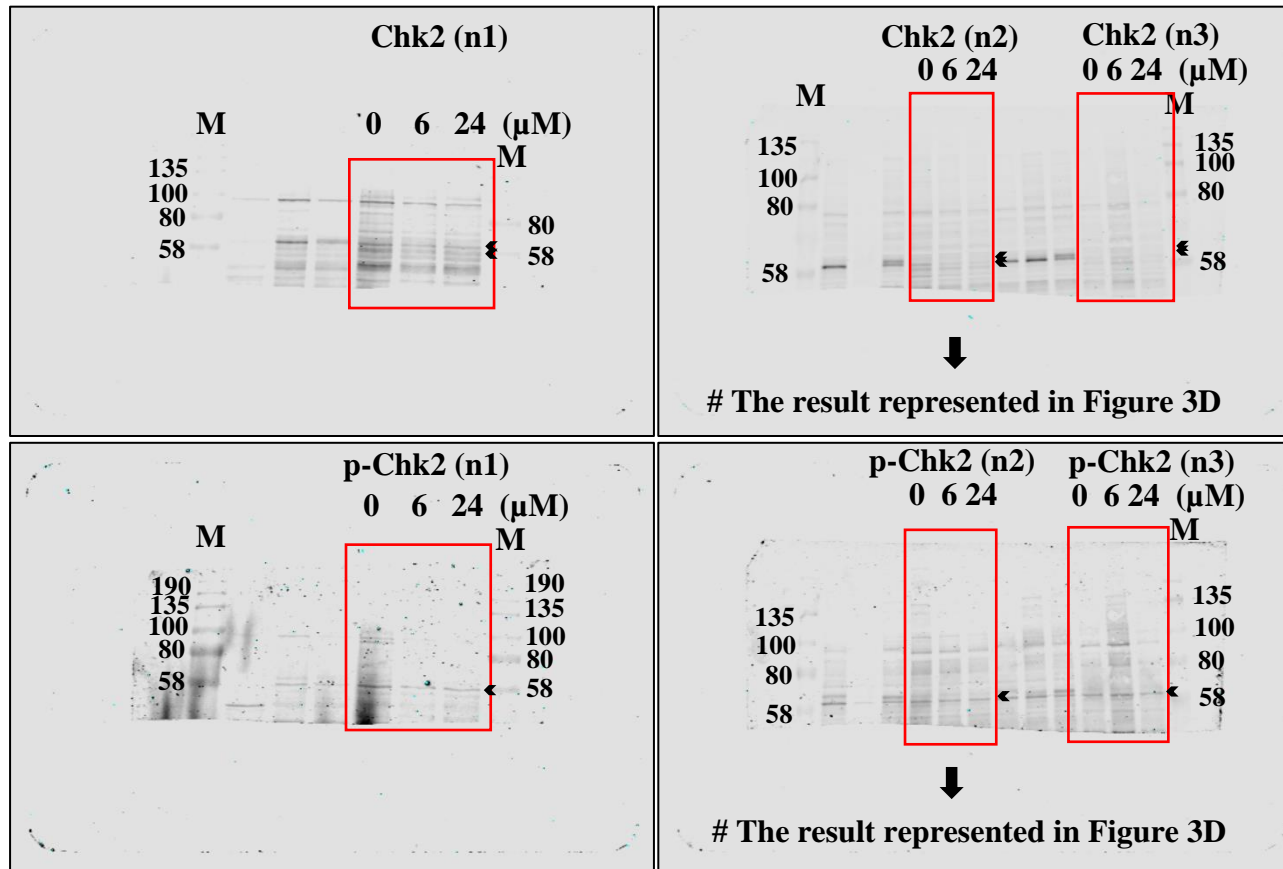

**$\beta$ -actin (42 KDa) of Chk2 and p-Chk2**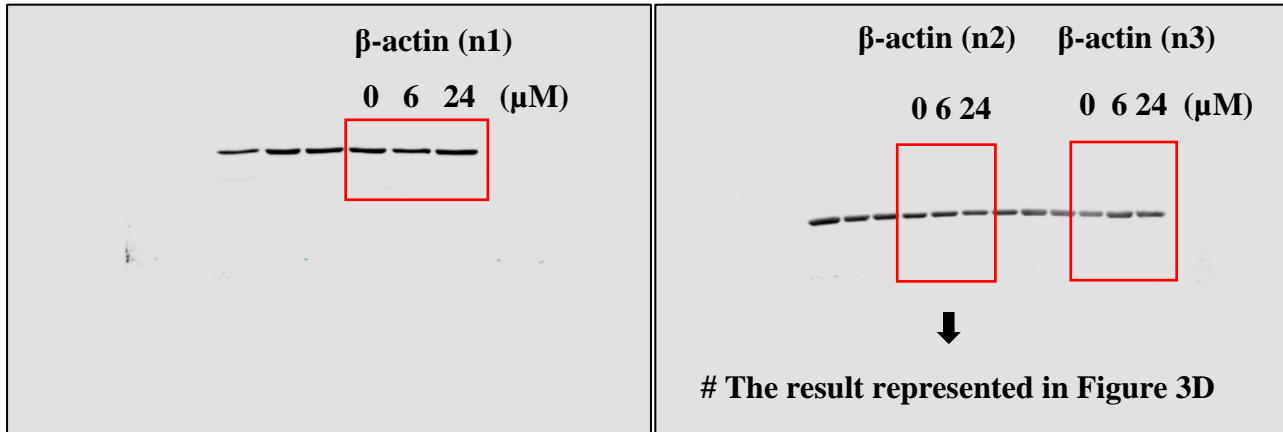



**p-H2AX Ser139 (17 KDa)**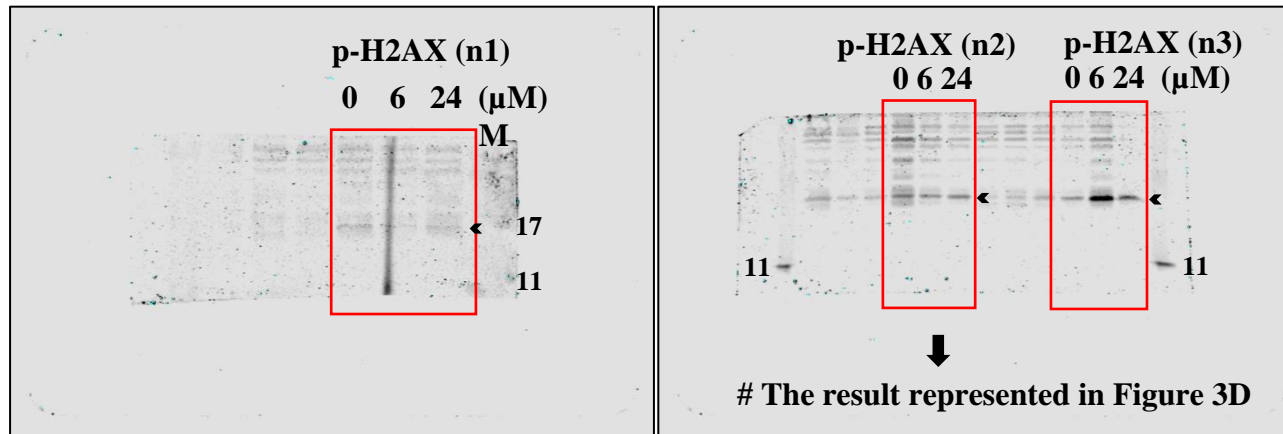 **$\beta$ -actin (42 KDa) of p-H2AX**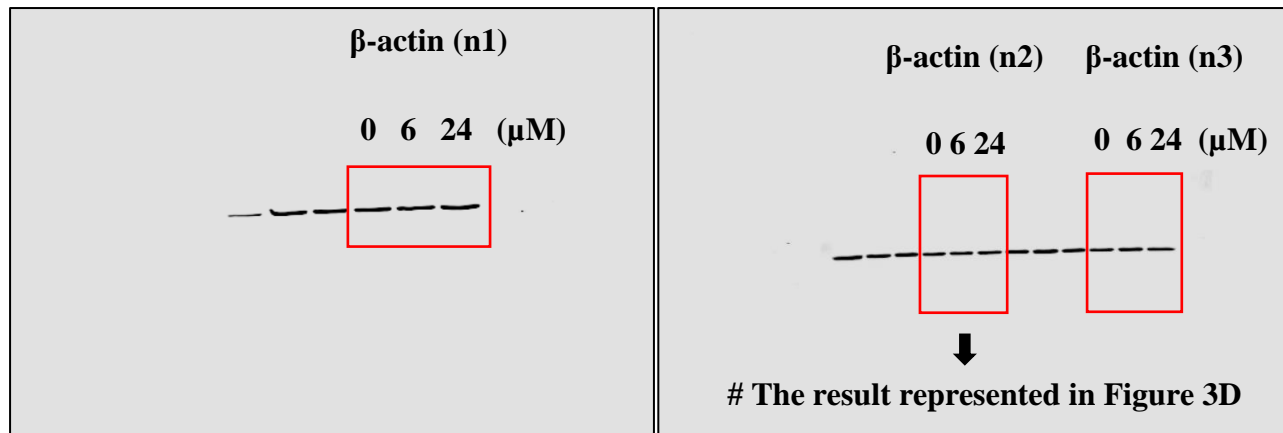

Rb (110 KDa, green) and p-Rb Ser780 (110 KDa, red)

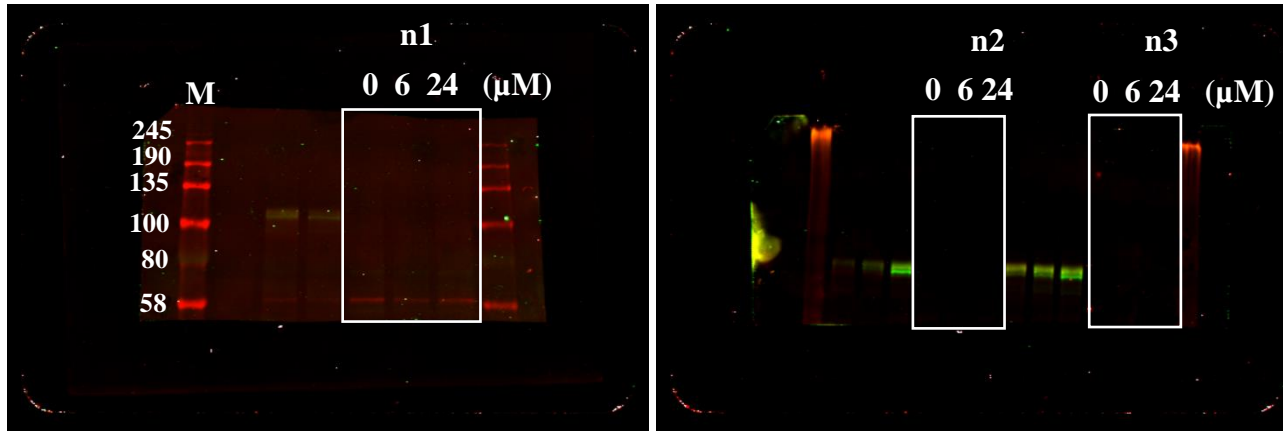

$\beta$ -actin (42 KDa, green) of Rb and p-Rb

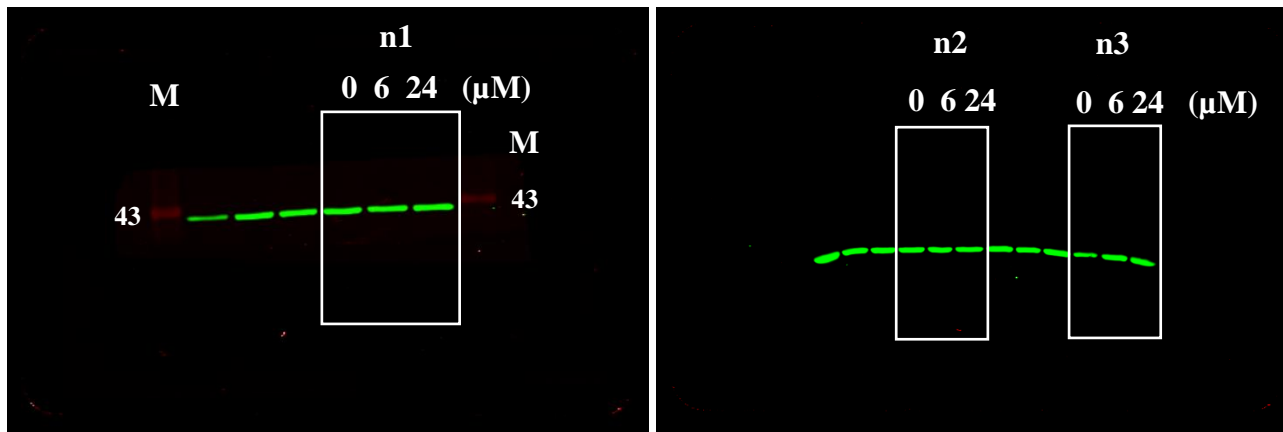

Chk1 (56 KDa, red) and p-Chk1 Ser345 (56 KDa, green)

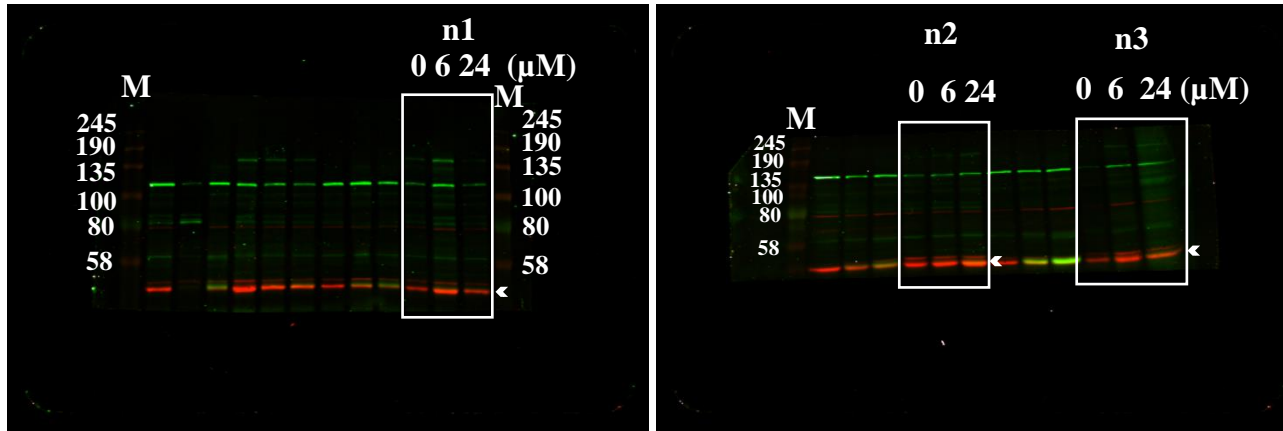

$\beta$ -actin (42 KDa, green) of Chk1 and p-Chk1

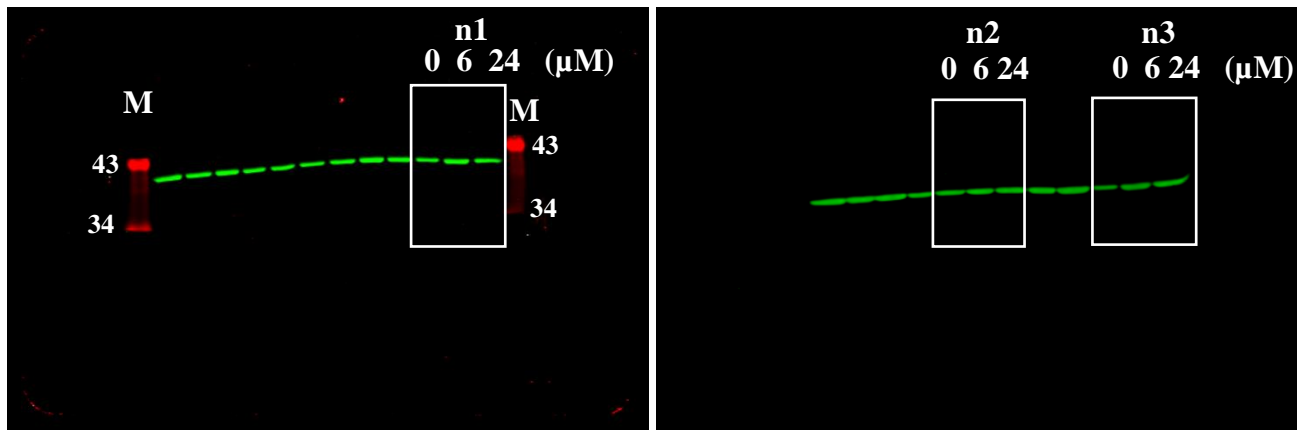

Chk2 (62 KDa, red) and p-Chk2 Ser516 (62 KDa, green)

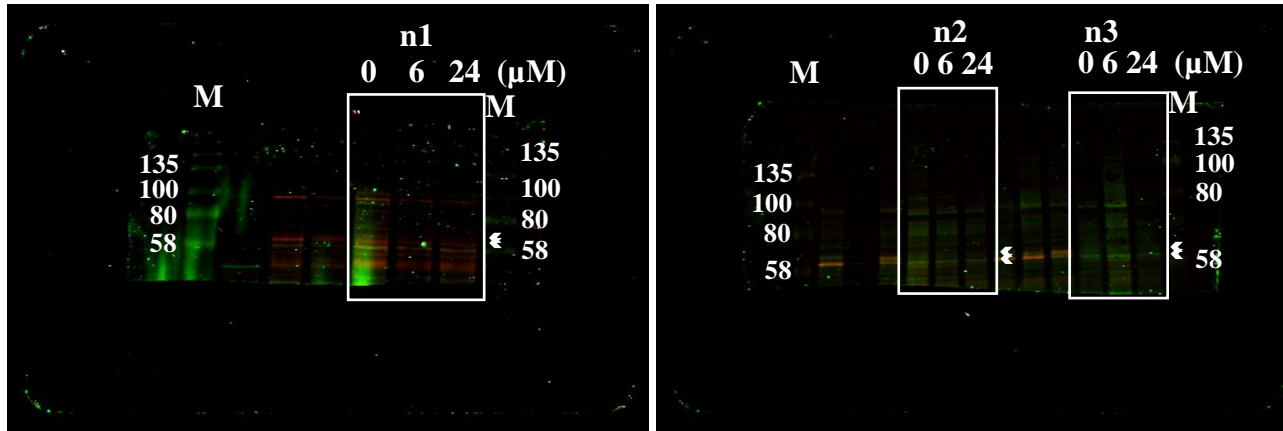

$\beta$ -actin (42 KDa, green) of Chk2 and p-Chk2

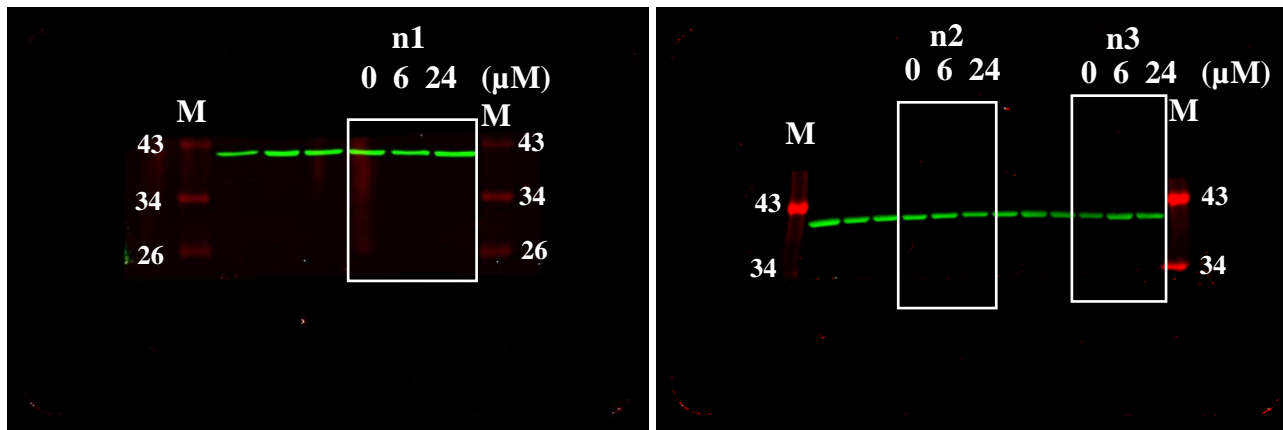

p-H2AX (17 KDa, green)

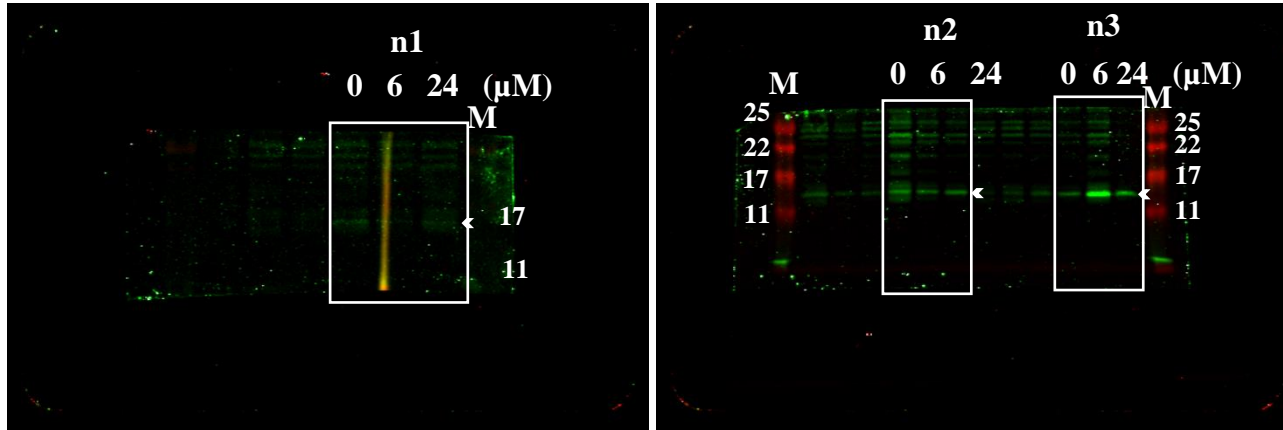

$\beta$ -actin (42 KDa, green) of p-H2AX

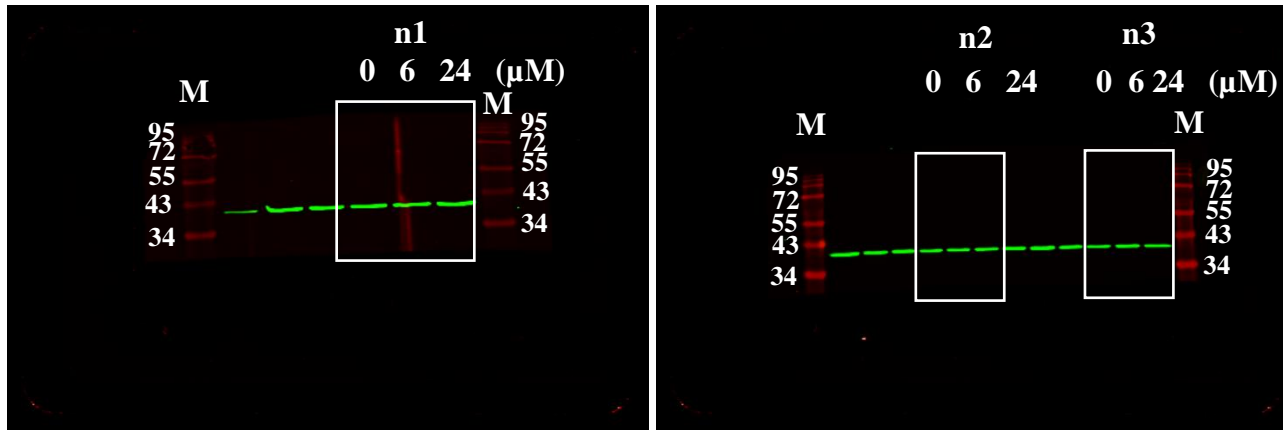

| 7HF concentration<br>( $\mu\text{M}$ ) | Absorbance (268 nm) |         |         |
|----------------------------------------|---------------------|---------|---------|
|                                        | #1                  | #2      | #3      |
| 125.85                                 | 0.09184             | 0.08400 | 0.05441 |
| 251.69                                 | 0.34277             | 0.38235 | 0.29000 |
| 503.38                                 | 0.41608             | 0.44129 | 0.49000 |
| 1,006.77                               | 0.68008             | 0.64546 | 0.63684 |
| 2,013.53                               | 0.70305             | 0.73100 | 0.91060 |
| 4,027.06                               | 0.96164             | 0.97003 | 0.83350 |

**Table S1:** Absorbance of 7HF ranged from 125.85-4,027.06  $\mu\text{M}$  at 268 nm. #1-#3, the sample n1-n3

| Time (h) | Absorbance (268 nm) |        |        |                      |        |        |
|----------|---------------------|--------|--------|----------------------|--------|--------|
|          | 7HF-cell culture    |        |        | 7HF-cell free medium |        |        |
|          | #1                  | #2     | #3     | #1                   | #2     | #3     |
| 0.00     | 0.000               | 0.000  | 0.000  | 0.000                | 0.000  | 0.000  |
| 0.25     | -0.037              | -0.091 | -0.035 | 0.188                | 0.256  | 0.200  |
| 0.50     | 0.008               | -0.022 | -0.003 | 0.359                | 0.333  | 0.355  |
| 0.75     | 0.205               | 0.239  | 0.141  | 0.249                | 0.226  | 0.306  |
| 1.00     | 0.240               | 0.190  | 0.211  | 0.292                | 0.280  | 0.312  |
| 5.00     | -0.024              | 0.025  | -0.004 | 0.279                | 0.381  | 0.363  |
| 9.00     | -0.181              | -0.092 | -0.095 | 0.387                | 0.332  | 0.358  |
| 13.00    | -0.207              | -0.209 | -0.099 | 0.196                | 0.212  | 0.285  |
| 17.00    | -0.300              | -0.282 | -0.177 | 0.230                | 0.094  | 0.172  |
| 24.00    | -0.269              | -0.295 | -0.248 | -0.104               | -0.063 | -0.150 |

**Table S2:** 1,006.77  $\mu\text{M}$  7HF was measured at wavelength 268 nm for 0.25-24 h both cell- and cell free condition. #1-#3, the sample n1-n3
